# Supplementary material
Source: PubMed Central journal article supplement (PMC2474869)
Supplement: supp_179_3_235_v2_1.pdf [file supp_179_3_235_v2_1.pdf]

**Appendix 1: MEDLINE search strategy**

1. exp ANTICOAGULANTS/
2. anticoagula\$.mp.
3. exp ADMINISTRATION,ORAL/
4. oral.mp.
5. acenocoumarol.mp.
6. dicumarol.mp.
7. ethyl biscoumacetate.mp.
8. phenprocoumon.mp.
9. warfarin.mp.
10. or/1-9
11. INTERNATIONAL NORMALIZED RATIO/
12. inr.mp.
13. international normalized ratio.mp.
14. or/11-13
15. exp HEMORRHAGE/
16. exp CEREBROVASCULAR ACCIDENT/
17. exp EMBOLISM/
18. exp THROMBOSIS/
19. exp VENOUS THROMBOSIS/
20. exp ISCHEMIA/
21. exp BRAIN ISCHEMIA/
22. exp CEREBROVASCULAR TRAUMA/
23. hemorrhage.mp.
24. bleed\$.mp.
25. stroke.mp.
26. thromboembol\$.mp.
27. or/15-26
28. 10 and 14 and 27

The databases were last searched Jan. 29, 2008.
