# Supplementary material
Source: PubMed Central journal article supplement (PMC2474869)
Supplement: supp_179_3_235_v2_2.pdf [file supp_179_3_235_v2_2.pdf]

**Appendix 2:** Detailed characteristics of 19 studies included in our systematic review and meta-analysis of anticoagulation intensity and risk of hemorrhagic and thromboembolic events (part 1 of 2)

| Study                             | Design | Setting | Drug     | Method | Start of OAC use       | Indication                    | N      | Age, mean (SD or range) | Female (%) | Mean follow-up (yr) | No. of events      |                       | Person-years of observation |
|-----------------------------------|--------|---------|----------|--------|------------------------|-------------------------------|--------|-------------------------|------------|---------------------|--------------------|-----------------------|-----------------------------|
|                                   |        |         |          |        |                        |                               |        |                         |            |                     | Hemorrhagic events | Thromboembolic events |                             |
| Rosove et al. <sup>1</sup>        | RC     | C       | W        | NR     | Before study           | VTE, APIA                     | 55     | 45.5 (17.3)             | 69         | 3.0                 | NR                 | 9                     | 162                         |
| Hutten et al. <sup>2</sup>        | RC     | C       | NR       | LI     | Start of study         | VTE                           | 1 303  | 62.5 (15)               | 48         | 0.2                 | 11                 | 34                    | 273                         |
| Yasaka et al. <sup>3</sup>        | RC     | C       | W        | E      | Start of study         | AF*                           | 203    | 68.0 (7.1)              | 25         | 1.8                 | 9                  | 18                    | 339                         |
| EAF <sup>4</sup>                  | RCT    | C       | NR       | E      | Start of study         | AF*                           | 214    | 71.0 (NR)               | 45         | 2.1                 | 11                 | 21                    | 377                         |
| Chimowitz et al. <sup>5</sup>     | RCT    | C       | W        | LI     | Start of study         | CVD                           | 289    | 64.3 (11.5)             | 37         | 1.8                 | 24                 | 40                    | 407                         |
| Andersen et al. <sup>6</sup>      | RC     | C       | W        | LI     | Start of study         | VHD                           | 204    | 62.5 (NR)               | 42         | 2.1                 | 14                 | 5                     | 431                         |
| Torn et al. <sup>7</sup>          | RC     | ACC     | NR       | LI     | 59% of pts new users   | CVD                           | 356    | 69.0 (24–93)            | 45         | 1.8                 | 22                 | 19                    | 614                         |
| Cheung et al. <sup>8</sup>        | RC     | C       | W        | LI     | >1 week before study   | AF                            | 555    | 69.7 (NR)               | 58         | 1.6†                | 18                 | 35                    | 856                         |
| ESPRIT <sup>9</sup>               | RCT    | C       | W, PH, A | LI     | 5% of pts new users    | CVD                           | 536    | 62.0 (10)               | 28         | 4.6                 | 31                 | 25                    | 1 408                       |
| Poli et al. <sup>10</sup>         | PC     | ACC     | W        | LI     | 31% of pts new users   | AF, VTE, IHD, other           | 903    | 63.5 (14.1)             | 41         | 1.9                 | 84                 | 63                    | 1 408                       |
| Tangelder et al. <sup>11</sup>    | RCT    | C       | PH, A    | LI     | Start of study         | PVD                           | 1 326  | 69.0 (33–93)            | 45         | 1.3                 | 80                 | 76                    | 1 699                       |
| Kearon et al. <sup>12</sup>       | RCT    | C       | W        | LI     | Start of study         | VTE                           | 738    | 57.0 (16)               | 45         | 2.4                 | 15                 | 11                    | 1 725                       |
| Casais et al. <sup>13</sup>       | RC     | ACC     | A        | LI     | >1 month before study  | VTE, VHD, CHF                 | 811    | 58.5 (5–88)             | 46         | 2.5                 | 25                 | NR                    | 1 959                       |
| Palareti et al. <sup>14</sup>     | PC     | ACC     | W, A     | LI     | <1 month before study  | VHD, IHD, CHF, other          | 2 745  | 62.4 (8–93)             | 43         | 0.7                 | NR                 | 63                    | 1 980                       |
| Palareti et al. <sup>15</sup>     | PC     | ACC     | W, A     | LI     | <1 month before study  | VHD, IHD, CHF, other          | 2 745  | 62.4 (8–93)             | 43         | 0.7                 | 23                 | NR                    | 1 980                       |
| Van Walraven et al. <sup>16</sup> | RC     | C       | W        | LI     | Before or during study | CVD, AF, VTE, VHD, IHD, other | 10 020 | 77.0 (6.9)              | 50         | 0.6                 | 182                | 124                   | 3 307                       |

**Appendix 2:** Detailed characteristics of 19 studies included in our systematic review and meta-analysis of anticoagulation intensity and risk of hemorrhagic and thromboembolic events\* (part 2 of 2)

| Study                      | Design | Setting | Drug  | Method | Start of OAC use | Indication             | N      | Age, mean (SD or range) | Female (%) | Mean follow-up (yr) | No. of events      |                       | Person-years of observation |
|----------------------------|--------|---------|-------|--------|------------------|------------------------|--------|-------------------------|------------|---------------------|--------------------|-----------------------|-----------------------------|
|                            |        |         |       |        |                  |                        |        |                         |            |                     | Hemorrhagic events | Thromboembolic events |                             |
| Azar et al. <sup>17</sup>  | RCT    | C       | PH, A | LI     | Start of study   | IHD                    | 1 700  | 61.0 (11)               | 19         | 2.0                 | 55                 | 375                   | 6 918                       |
| Hylek et al. <sup>18</sup> | RC     | C       | W     | LI     | Before study     | AF                     | 13 559 | 76.0 (54–94)            | 48         | 0.9                 | 61                 | 152                   | 12 592                      |
| Oden et al. <sup>19</sup>  | RC     | ACC     | NR    | NR     | Start of study   | CVD, AF, VTE, VHD, IHD | 42 451 | 70.5 (9.1)              | 42         | 1.4                 | 243                | NR                    | 60 465                      |
| Overall                    |        |         |       |        |                  |                        | 80 713 | 64.8                    | 44         | 1.8                 | 908                | 1 070                 | 98 900                      |

Note: A = acenocoumarol, ACC = anticoagulation clinic, AF = atrial fibrillation, APIA = antiphospholipid antibodies, C = community, CHF = chronic heart failure, CVD = cerebrovascular disease, E = Equidivision, EAFT = European Atrial Fibrillation Trial Study Group, ESPRIT = European and Australian Stroke Prevention in Reversible Ischaemia Trial, IHD = ischemic heart disease, LI = linear interpolation NR = not reported, OAC = oral anticoagulant, PC = prospective cohort, PH = phenprocoumon, PVD = peripheral vascular disease, RC = retrospective cohort, RCT = randomized controlled trial, SD = standard deviation, VHD = valvular heart disease, VTE = venous thromboembolism, W = warfarin.  
\*Atrial fibrillation patients with a previous ischemic stroke.

†Median.

## References

1. Rosove MH, Brewer PM. Antiphospholipid thrombosis: clinical course after the first thrombotic event in 70 patients. *Ann Intern Med* 1992;117:303-8.
2. Hutten BA, Prins MH, Gent M, et al. Incidence of recurrent thromboembolic and bleeding complications among patients with venous thromboembolism in relation to both malignancy and achieved international normalized ratio: a retrospective analysis. *J Clin Oncol* 2000;18:3078-83.
3. Yasaka M, Minematsu K, Yamaguchi T. Optimal intensity of international normalized ratio in warfarin therapy for secondary prevention of stroke in patients with non-valvular atrial fibrillation. *Intern Med* 2001;40:1183-8.
4. Optimal oral anticoagulant therapy in patients with nonrheumatic atrial fibrillation and recent cerebral ischemia. The European Atrial Fibrillation Trial Study Group. *N Engl J Med* 1995;333:5-10.
5. Chimowitz MI, Lynn MJ, Howlett-Smith H, et al. Comparison of warfarin and aspirin for symptomatic intracranial arterial stenosis. *N Engl J Med* 2005;352:1305-16.
6. Andersen PV, Aagaard J. Low-dose warfarin in patients with Carbomedics heart valve prostheses. *Asian Cardiovasc Thorac Ann* 2000;8:11-4.
7. Torn M, Algra A, Rosendaal FR. Oral anticoagulation for cerebral ischemia of arterial origin: high initial bleeding risk. *Neurology* 2001;57:1993-9.
8. Cheung CM, Tsoi TH, Huang CY. The lowest effective intensity of prophylactic anticoagulation for patients with atrial fibrillation. *Cerebrovasc Dis* 2005;20:114-9.
9. ESPRIT Study Group; Algra A. Medium intensity oral anticoagulants versus aspirin after cerebral ischaemia of arterial origin (ESPRIT): a randomised controlled trial. *Lancet Neurol* 2007;6:115-24.
10. Poli D, Antonucci E, Lombardi A, et al. Low rate of bleeding and thrombotic complications of oral anticoagulant therapy independent of age in the real-practice of an anticoagulation clinic. *Blood Coagul Fibrinolysis* 2003;14:269-75.
11. Tangelder MJD, Algra A, Lawson JA, et al. Optimal oral anticoagulant intensity to prevent secondary ischemic and hemorrhagic events in patients after infrainguinal bypass graft surgery. *J Vasc Surg* 2001;33:522-7.
12. Kearon C, Ginsberg JS, Kovacs MJ, et al. Comparison of low-intensity warfarin therapy with conventional-intensity warfarin therapy for long-term prevention of recurrent venous thromboembolism. *N Engl J Med* 2003;349:631-9.
13. Casais P, Luceros AS, Meschengieser S, et al. Bleeding risk factors in chronic oral anticoagulation with acenocoumarol. *Am J Hematol* 2000;63:192-6.
14. Palareti G, Manotti C, D'Angelo A, et al. Thrombotic events during oral anticoagulant treatment: results of the inception-cohort, prospective, collaborative ISCOAT study: ISCOAT study group (Italian Study on Complications of Oral Anticoagulant Therapy). *Thromb Haemost* 1997;78:1438-43.
15. Palareti G, Leali N, Coccheri S, et al. Bleeding complications of oral anticoagulant treatment: an inception-cohort, prospective collaborative study (ISCOAT). Italian Study on Complications of Oral Anticoagulant Therapy. *Lancet* 1996;348:423-8.
16. Van Walraven C, Oake N, Wells PS, et al. Burden of potentially avoidable anticoagulant-associated hemorrhagic and thromboembolic events in the elderly. *Chest* 2007;131:1508-15.

Appendix 2 to Oake N, Jennings A, Forster A, et al. Anticoagulation intensity and outcomes among patients prescribed oral anticoagulant therapy: a systematic review and meta-analysis. *CMAJ* 2008; 179(3):235-44.

17. Azar AJ, Cannegieter SC, Deckers JW, et al. Optimal intensity of oral anticoagulant therapy after myocardial infarction. *J Am Coll Cardiol* 1996;27:1349-55.
18. Hylek EM, Go AS, Chang Y, et al. Effect of intensity of oral anticoagulation on stroke severity and mortality in atrial fibrillation. *N Engl J Med* 2003;349:1019-26.
19. Oden A, Fahlen M. Oral anticoagulation and risk of death: a medical record linkage study. *BMJ* 2002;325:1073-5.
