# Supplementary material
Source: PubMed Central journal article supplement (PMC2474869)
Supplement: supp_179_3_235_v2_4.pdf [file supp_179_3_235_v2_4.pdf]

**Appendix 4:** Hemorrhagic and thromboembolic event rates in each study in 4 categories of international normalized ratios (part 1 of 2)

| Study                        | International normalized ratio; event rate |                             |                                   |                             |                                   |                             |                                   |                             |                                   |  |
|------------------------------|--------------------------------------------|-----------------------------|-----------------------------------|-----------------------------|-----------------------------------|-----------------------------|-----------------------------------|-----------------------------|-----------------------------------|--|
|                              | < 2                                        |                             | 2–3                               |                             | 3–5                               |                             | > 5                               |                             |                                   |  |
|                              | No. of patients                            | No. of events / patient-yrs | Rate per 100 patient-yrs (95% CI) | No. of events / patient-yrs | Rate per 100 patient-yrs (95% CI) | No. of events / patient-yrs | Rate per 100 patient-yrs (95% CI) | No. of events / patient-yrs | Rate per 100 patient-yrs (95% CI) |  |
| <b>Hemorrhagic events</b>    |                                            |                             |                                   |                             |                                   |                             |                                   |                             |                                   |  |
| Hutten <sup>1</sup>          | 1 303                                      | 4/63.3                      | 6.3 (1.7–16.2)                    | 4/152.3                     | 2.6 (1.8–3.7)                     | 3/57.7                      | 5.2 (1.1–15.2)                    | *                           |                                   |  |
| Yasaka <sup>2</sup>          | 203                                        | 0/192.0                     | 0.0 (0.0–0.0)                     | 7/140.0                     | 5.0 (2.0–10.3)                    | 2/7.0                       | 28.6 (3.5–103.1)                  | *                           |                                   |  |
| EAFT <sup>3</sup>            | 214                                        | 0/40.0                      | 0.0 (0.0–0.0)                     | 2/186.0                     | 1.1 (0.1–3.9)                     | 4/141.0                     | 2.8 (0.8–7.3)                     | 5/10.0                      | 50.0 (16.2–116.5)                 |  |
| Chimowitz <sup>4</sup>       | 289                                        | 1/92.5                      | 1.1 (0.0–6.0)                     | 9/256.9                     | 3.5 (1.6–6.7)                     | 8/52.6                      | 15.2 (6.6–30.0)                   | 6/4.9                       | 122.4 (45.0–267.0)                |  |
| Andersen <sup>5</sup>        | 204                                        | 0/50.2                      | 0.0 (0.0–0.0)                     | 3/242.0                     | 1.2 (0.6–2.2)                     | 3/135.0                     | 2.2 (1.1–4.0)                     | 8/4.0                       | 200.0 (99.8–358.0)                |  |
| Torn <sup>6</sup>            | 356                                        | 0/12.1                      | 0.0 (0.0–0.0)                     | 2/147.7                     | 1.4 (0.2–4.9)                     | 14/432.5                    | 3.2 (1.8–5.4)                     | 6/21.6                      | 27.8 (10.2–60.6)                  |  |
| Cheung <sup>7</sup>          | 555                                        | 3/456.0                     | 0.7 (0.1–1.9)                     | 7/361.0                     | 1.9 (0.8–4.0)                     | 8/39.0                      | 20.5 (8.8–40.4)                   | *                           |                                   |  |
| ESPRIT <sup>8</sup>          | 536                                        | 4/147.0                     | 2.7 (1.2–5.4)                     | 6/966.0                     | 0.6 (0.3–1.2)                     | 9/266.0                     | 3.4 (1.5–6.7)                     | 12/29.0                     | 41.4 (17.8–81.5)                  |  |
| Poli <sup>9</sup>            | 903                                        | 12/112.0                    | 10.7 (5.5–18.8)                   | 41/842.0                    | 4.9 (3.5–6.6)                     | 26/428.0                    | 6.1 (4.0–8.9)                     | 5/25.6                      | 19.5 (6.3–45.5)                   |  |
| Tangelder <sup>10</sup>      | 1 326                                      | 9/150.0                     | 6.0 (2.7–11.4)                    | 13/505.0                    | 2.6 (1.3–4.4)                     | 38/945.0                    | 4.0 (2.8–5.6)                     | 20/99.0                     | 20.2 (12.3–30.7)                  |  |
| Kearon <sup>11</sup>         | 738                                        | 3/847.5                     | 0.4 (0.1–1.0)                     | 4/743.4                     | 0.5 (0.1–1.4)                     | 8/134.1                     | 6.0 (2.6–11.7)                    | *                           |                                   |  |
| Casais <sup>12</sup>         | 811                                        | 2/179.8                     | 1.1 (0.1–4.0)                     | 8/707.2                     | 1.1 (0.5–2.2)                     | 5/859.5                     | 0.6 (0.2–1.4)                     | 10/212.8                    | 4.7 (2.3–8.6)                     |  |
| Palareti <sup>13</sup>       | 2 745                                      | 6/377.0                     | 1.6 (1.1–2.3)                     | 9/1116.0                    | 0.8 (0.6–1.1)                     | 5/442.0                     | 1.1 (0.8–1.5)                     | 5/45.0                      | 11.1 (7.0–16.7)                   |  |
| Van Walraven <sup>14</sup>   | 10 020                                     | 31/884.8                    | 3.5 (2.1–5.5)                     | 76/1954.0                   | 3.9 (2.8–5.3)                     | 52/450.8                    | 11.5 (7.3–17.3)                   | 23/17.5                     | 131.4 (65.6–235.3)                |  |
| Azar <sup>15</sup>           | 1 700                                      | 8/3559.0                    | 0.2 (0.1–0.4)                     | 5/838.0                     | 0.6 (0.2–1.4)                     | 30/2339.0                   | 1.3 (0.9–1.8)                     | 12/182.0                    | 6.6 (3.4–11.5)                    |  |
| Hylek <sup>16</sup>          | 13 559                                     | 12/3428.0                   | 0.4 (0.2–0.6)                     | 28/7809.0                   | 0.4 (0.2–0.5)                     | 10/1237.0                   | 0.8 (0.4–1.5)                     | 11/118.0                    | 9.3 (4.7–16.7)                    |  |
| Oden <sup>17</sup>           | 42 451                                     | 28/8533.3                   | 0.3 (0.2–0.5)                     | 133/42402.1                 | 0.3 (0.2–0.4)                     | 74/9311.6                   | 0.8 (0.6–1.0)                     | 8/217.6                     | 3.7 (1.6–7.2)                     |  |
| <b>Thromboembolic events</b> |                                            |                             |                                   |                             |                                   |                             |                                   |                             |                                   |  |
| Rosove <sup>18</sup>         | 55                                         | 6/11.3                      | 53.1 (19.5–115.8)                 | 3/40.9                      | 7.3 (1.5–21.4)                    | 0/110.2                     | 0.0 (0.0–0.0)                     | *                           |                                   |  |
| Hutten <sup>1</sup>          | 1 303                                      | 15/63.3                     | 23.7 (13.3–39.1)                  | 14/152.3                    | 9.2 (5.0–15.4)                    | 5/57.7                      | 8.7 (2.8–20.2)                    | *                           |                                   |  |
| Yasaka <sup>2</sup>          | 203                                        | 14/192.0                    | 7.3 (4.0–12.3)                    | 4/140.0                     | 2.9 (2.0–4.0)                     | 0/7.0                       | 0.0 (0.0–0.0)                     | *                           |                                   |  |
| EAFT <sup>3</sup>            | 214                                        | 7/40.0                      | 17.5 (7.0–36.1)                   | 3/186.0                     | 1.6 (0.3–4.7)                     | 10/141.0                    | 7.1 (3.4–13.0)                    | 1/10.0                      | 10.0 (0.3–55.7)                   |  |

Appendix 4 to Oake N, Jennings A, Forster A, et al. Anticoagulation intensity and outcomes among patients prescribed oral anticoagulant therapy: a systematic review and meta-analysis. *CMAJ* 2008; 179(3): 235-44.

**Appendix 4:** Hemorrhagic and thromboembolic event rates in each study in 4 categories of international normalized ratios (part 2 of 2)

| Study                      | International normalized ratio; event rate |                            |                                  |                            |                                  |                            |                                  |                            |                                  |                            |                                  |
|----------------------------|--------------------------------------------|----------------------------|----------------------------------|----------------------------|----------------------------------|----------------------------|----------------------------------|----------------------------|----------------------------------|----------------------------|----------------------------------|
|                            | < 2                                        |                            | 2-3                              |                            | 3-5                              |                            | > 5                              |                            |                                  |                            |                                  |
|                            | No. of patients                            | No. of events / patient-yr | Rate per 100 patient-yr (95% CI) | No. of events / patient-yr | Rate per 100 patient-yr (95% CI) | No. of events / patient-yr | Rate per 100 patient-yr (95% CI) | No. of events / patient-yr | Rate per 100 patient-yr (95% CI) | No. of events / patient-yr | Rate per 100 patient-yr (95% CI) |
| Chimowitz <sup>4</sup>     | 289                                        | 23/92.5                    | 24.9 (15.9–37.3)                 | 13/2565.9                  | 5.1 (2.6–8.7)                    | 3/52.6                     | 5.7 (1.2–16.7)                   | 1/4.9                      | 20.4 (0.5–113.7)                 |                            |                                  |
| Andersen <sup>5</sup>      | 204                                        | 0/50.2                     | 0.0 (0.0–0.0)                    | 4/242.0                    | 1.7 (0.8–3.0)                    | 1/135.0                    | 0.7 (0.4–1.3)                    | 0/4.0                      | 0.0 (0.0–0.0)                    |                            |                                  |
| Torn <sup>6</sup>          | 356                                        | 3/12.1                     | 24.8 (5.1–72.4)                  | 5/147.7                    | 3.4 (1.1–7.9)                    | 8/432.5                    | 1.8 (0.8–3.6)                    | 3/21.6                     | 13.9 (2.9–40.6)                  |                            |                                  |
| Cheung <sup>7</sup>        | 555                                        | 28/456.0                   | 6.1 (4.1–8.9)                    | 7/361.0                    | 1.9 (0.8–4.0)                    | 0/39.0                     | 0.0 (0.0–0.0)                    | *                          |                                  |                            |                                  |
| ESPRIT <sup>8</sup>        | 536                                        | 5/147.0                    | 3.4 (0.9–8.7)                    | 15/966.0                   | 1.6 (0.4–4.0)                    | 4/266.0                    | 1.5 (0.4–3.8)                    | 1/29                       | 3.4 (0.9–8.8)                    |                            |                                  |
| Poli <sup>9</sup>          | 903                                        | 20/112.0                   | 17.9 (10.9–27.1)                 | 31/842.0                   | 3.7 (2.5–5.3)                    | 12/428.0                   | 2.8 (1.4–4.9)                    | 0/25.6                     | 0.0 (0.0–0.0)                    |                            |                                  |
| Tangelder <sup>10</sup>    | 1 326                                      | 23/150.0                   | 15.3 (9.7–23.0)                  | 26/505.0                   | 5.1 (3.4–7.6)                    | 11/945.0                   | 1.2 (0.6–2.1)                    | 16/99.0                    | 16.2 (9.2–26.2)                  |                            |                                  |
| Kearon <sup>11</sup>       | 738                                        | 8/847.5                    | 0.9 (0.4–1.9)                    | 2/743.4                    | 0.3 (0.0–1.0)                    | 1/134.1                    | 0.7 (0.0–4.2)                    | *                          |                                  |                            |                                  |
| Palareti <sup>19</sup>     | 2 745                                      | 27/377.0                   | 7.2 (4.7–10.5)                   | 26/1116.0                  | 2.3 (1.5–3.4)                    | 10/487.0                   | 2.1 (1.0–3.8)                    | *                          |                                  |                            |                                  |
| Van Walraven <sup>14</sup> | 10 020                                     | 46/862.4                   | 5.3 (3.5–7.1)                    | 50/1910.6                  | 2.6 (1.5–3.0)                    | 24/442.1                   | 5.4 (2.3–6.8)                    | 4/16.9                     | 23.7 (7.6–71.6)                  |                            |                                  |
| Azar <sup>15</sup>         | 1 700                                      | 282/3559.0                 | 7.9 (7.0–9.0)                    | 27/838.0                   | 3.2 (2.1–4.7)                    | 64/2339.0                  | 2.7 (2.1–3.6)                    | 2/182.0                    | 1.1 (0.1–4.0)                    |                            |                                  |
| Hylek <sup>16</sup>        | 13 559                                     | 97/3428.0                  | 2.8 (2.3–3.5)                    | 43/7809.0                  | 0.6 (0.4–0.7)                    | 9/1237.0                   | 0.7 (0.3–1.4)                    | 3/118.0                    | 2.5 (0.5–7.4)                    |                            |                                  |

Note: EAFT = European Atrial Fibrillation Trial Study Group.

\*Study reported events and observation time for international normalized ratio range > 3. We grouped data for this range into the 3–5 category.

**References**

1. Hutten BA, Prins MH, Gent M, et al. Incidence of recurrent thromboembolic and bleeding complications among patients with venous thromboembolism in relation to both malignancy and achieved international normalized ratio: a retrospective analysis. *J Clin Oncol* 2000;18:3078-83.
2. Yasaka M, Minematsu K, Yamaguchi T. Optimal intensity of international normalized ratio in warfarin therapy for secondary prevention of stroke in patients with non-valvular atrial fibrillation. *Intern Med* 2001;40:1183-8.
3. Optimal oral anticoagulant therapy in patients with nonrheumatic atrial fibrillation and recent cerebral ischemia. The European Atrial Fibrillation Trial Study Group. *N Engl J Med* 1995;333:5-10.
4. Chimowitz MI, Lynn MJ, Howlett-Smith H, et al. Comparison of warfarin and aspirin for symptomatic intracranial arterial stenosis. *N Engl J Med* 2005;352:1305-16.
5. Andersen PV, Aagaard J. Low-dose warfarin in patients with Carbomedics heart valve prostheses. *Asian Cardiovasc Thorac Ann* 2000;8:11-4.
6. Torn M, Algra A, Rosendaal FR. Oral anticoagulation for cerebral ischemia of arterial origin: high initial bleeding risk. *Neurology* 2001;57:1993-9.
7. Cheung CM, Tsoi TH, Huang CY. The lowest effective intensity of prophylactic anticoagulation for patients with atrial fibrillation. *Cerebrovasc Dis* 2005;20:114-9.
8. ESPRIT Study Group; Algra A. Medium intensity oral anticoagulants versus aspirin after cerebral ischaemia of arterial origin (ESPRIT): a randomised controlled trial. *Lancet Neurol* 2007;6:115-24.

Appendix 4 to Oake N, Jennings A, Forster A, et al. Anticoagulation intensity and outcomes among patients prescribed oral anticoagulant therapy: a systematic review and meta-analysis. *CMAJ* 2008; 179(3): 235-44.

9. Poli D, Antonucci E, Lombardi A, et al. Low rate of bleeding and thrombotic complications of oral anticoagulant therapy independent of age in the real-practice of an anticoagulation clinic. *Blood Coagul Fibrinolysis* 2003;14:269-75.
10. Tangelder MJD, Algra A, Lawson JA, et al. Optimal oral anticoagulant intensity to prevent secondary ischemic and hemorrhagic events in patients after infrainguinal bypass graft surgery. *J Vasc Surg* 2001;33:522-7.
11. Kearon C, Ginsberg JS, Kovacs MJ, et al. Comparison of low-intensity warfarin therapy with conventional-intensity warfarin therapy for long-term prevention of recurrent venous thromboembolism. *N Engl J Med* 2003;349:631-9.
12. Casais P, Luceros AS, Meschengieser S, et al. Bleeding risk factors in chronic oral anticoagulation with acenocoumarol. *Am J Hematol* 2000;63:192-6.
13. Palareti G, Leali N, Coccheri S, et al. Bleeding complications of oral anticoagulant treatment: an inception-cohort, prospective collaborative study (ISCOAT). Italian Study on Complications of Oral Anticoagulant Therapy. *Lancet* 1996;348:423-8.
14. Van Walraven C, Oake N, Wells PS, et al. Burden of potentially avoidable anticoagulant-associated hemorrhagic and thromboembolic events in the elderly. *Chest* 2007;131:1508-15.
15. Azar AJ, Cannegieter SC, Deckers JW, et al. Optimal intensity of oral anticoagulant therapy after myocardial infarction. *J Am Coll Cardiol* 1996;27:1349-55.
16. Hylek EM, Go AS, Chang Y, et al. Effect of intensity of oral anticoagulation on stroke severity and mortality in atrial fibrillation. *N Engl J Med* 2003;349:1019-26.
17. Oden A, Fahlen M. Oral anticoagulation and risk of death: a medical record linkage study. *BMJ* 2002;325:1073-5.
18. Rosove MH, Brewer PM. Antiphospholipid thrombosis: clinical course after the first thrombotic event in 70 patients. *Ann Intern Med* 1992;117:303-8.
19. Palareti G, Manotti C, D'Angelo A, et al. Thrombotic events during oral anticoagulant treatment: results of the inception-cohort, prospective, collaborative ISCOAT study: ISCOAT study group (Italian Study on Complications of Oral Anticoagulant Therapy). *Thromb Haemost* 1997;78:1438-43.
