# Supplementary material
Source: PubMed Central journal article supplement (PMC2474869)
Supplement: supp_179_3_235_v2_5.pdf [file supp_179_3_235_v2_5.pdf]

**Appendix 5: Anticoagulation intensity and risk of hemorrhagic and thromboembolic events (part 1 of 2)**

| International normalized ratio | Hemorrhagic event |                        | Thromboembolic event |                        | Combined events |                        |
|--------------------------------|-------------------|------------------------|----------------------|------------------------|-----------------|------------------------|
|                                | n / N             | Relative risk (95% CI) | n / N                | Relative risk (95% CI) | n / N           | Relative risk (95% CI) |
| Rosove et al. <sup>1</sup>     | NR                |                        | 6 / 55               |                        | NR              |                        |
| < 2                            |                   | NR                     |                      | 7.2 (1.9–539.3)        |                 | NR                     |
| 3–5                            |                   | NR                     |                      | 0.0 (0.0–0.0)          |                 | NR                     |
| > 5                            |                   | NR                     |                      | NR                     |                 | NR                     |
| Hutten et al. <sup>2</sup>     | 4 / 1 303         |                        | 15 / 1 303           |                        | 19 / 1 303      |                        |
| < 2                            |                   | 2.4 (0.4–13.3)         |                      | 2.6 (1.2–5.6)          |                 | 2.5 (1.3–5.0)          |
| 3–5                            |                   | 2.0 (0.2–10.2)         |                      | 0.9 (0.2–2.3)          |                 | 1.2 (0.8–1.3)          |
| > 5                            |                   | NR                     |                      | NR                     |                 | NR                     |
| Yasaka et al. <sup>3</sup>     | 0 / 203           |                        | 14 / 203             |                        | 14 / 203        |                        |
| < 2                            |                   | 0.0 (0.0–0.0)          |                      | 2.6 (1.0–23.4)         |                 | 0.9 (0.4–2.2)          |
| 3–5                            |                   | 5.7 (0.0–19.5)         |                      | 0.0 (0.0–0.0)          |                 | 3.6 (0.0–10.8)         |
| > 5                            |                   | NR                     |                      | NR                     |                 | NR                     |
| EAFT <sup>4</sup>              | 0 / 214           |                        | 7 / 214              |                        | 7 / 214         |                        |
| < 2                            |                   | 0.0 (0.0–0.0)          |                      | 10.9 (3.3–286.5)       |                 | 6.5 (2.0–29.1)         |
| 3–5                            |                   | 2.6 (0.5–31.4)         |                      | 4.4 (1.5–759.3)        |                 | 3.7 (1.5–18.9)         |
| > 5                            |                   | 46.5 (11.4–398.6)      |                      | 6.2 (0.0–11.0)         |                 | 22.3 (6.2–97.4)        |
| Chimowitz et al. <sup>5</sup>  | 1 / 289           |                        | 23 / 289             |                        | 24 / 289        |                        |
| < 2                            |                   | 0.3 (0.0–1.1)          |                      | 4.9 (2.6–10.8)         |                 | 3.0 (1.7–5.5)          |
| 3–5                            |                   | 4.3 (2.0–16.0)         |                      | 1.1 (0.0–3.0)          |                 | 2.4 (1.0–4.8)          |
| > 5                            |                   | 35.0 (9.4–96.5)        |                      | 4.0 (0.0–13.6)         |                 | 16.7 (4.9–34.5)        |
| Andersen et al. <sup>6</sup>   | 0 / 204           |                        | 0 / 204              |                        | 0 / 204         |                        |
| < 2                            |                   | 0.0 (0.0–0.0)          |                      | 0.0 (0.0–0.0)          |                 | 0.0 (0.0–0.0)          |
| 3–5                            |                   | 1.8 (1.1–2.9)          |                      | 0.4 (0.0–2.2)          |                 | 1.0 (0.2–3.3)          |
| > 5                            |                   | 161.3 (94.0–332.5)     |                      | 0.0 (0.0–0.0)          |                 | 69.1 (23.6–222.0)      |
| Torn et al. <sup>7</sup>       | 0 / 356           |                        | 3 / 356              |                        | 3 / 356         |                        |
| < 2                            |                   | 0.0 (0.0–0.0)          |                      | 7.3 (0.5–30.0)         |                 | 5.2 (0.2–17.1)         |
| 3–5                            |                   | 2.4 (0.8–9.6)          |                      | 0.5 (0.2–2.5)          |                 | 1.1 (0.5–3.6)          |
| > 5                            |                   | 20.5 (5.6–143.4)       |                      | 4.1 (0.3–16.8)         |                 | 8.8 (3.2–28.3)         |
| Cheung et al. <sup>8</sup>     | 3 / 555           |                        | 28 / 555             |                        | 31 / 555        |                        |
| < 2                            |                   | 0.3 (0.0–1.1)          |                      | 3.2 (1.6–10.9)         |                 | 1.8 (1.0–3.7)          |
| 3–5                            |                   | 10.6 (3.6–34.0)        |                      | 0.0 (0.0–0.0)          |                 | 5.3 (1.8–12.0)         |
| > 5                            |                   | NR                     |                      | NR                     |                 | NR                     |
| ESPRIT <sup>9</sup>            | 4 / 536           |                        | 5 / 536              |                        | 9 / 536         |                        |
| < 2                            |                   | 4.4 (0.7–15.6)         |                      | 2.2 (0.4–5.2)          |                 | 2.8 (1.0–5.7)          |
| 3–5                            |                   | 5.4 (3.4–9.3)          |                      | 1.0 (0.1–2.4)          |                 | 2.3 (1.0–4.4)          |
| > 5                            |                   | 66.6 (39.3–127.1)      |                      | 2.2 (0.0–4.9)          |                 | 20.6 (9.3–40.0)        |
| Poli et al. <sup>10</sup>      | 12 / 903          |                        | 20 / 903             |                        | 32 / 903        |                        |
| < 2                            |                   | 2.2 (1.0–3.9)          |                      | 4.9 (2.6–8.3)          |                 | 3.3 (2.1–4.9)          |
| 3–5                            |                   | 1.2 (0.7–2.0)          |                      | 0.8 (0.3–1.4)          |                 | 1.0 (0.7–1.5)          |
| > 5                            |                   | 4.0 (0.6–8.2)          |                      | 0.0 (0.0–0.0)          |                 | 2.3 (0.3–4.5)          |
| Tangelder et al. <sup>11</sup> | 9 / 1 326         |                        | 23 / 1 326           |                        | 32 / 1 326      |                        |
| < 2                            |                   | 2.3 (0.9–5.4)          |                      | 3.0 (1.7–5.2)          |                 | 2.8 (1.7–4.4)          |
| 3–5                            |                   | 1.6 (0.9–3.4)          |                      | 0.2 (0.1–0.4)          |                 | 0.7 (0.4–1.0)          |
| > 5                            |                   | 7.8 (4.0–17.3)         |                      | 3.1 (1.6–5.7)          |                 | 4.7 (3.0–7.4)          |

**Appendix 5: Anticoagulation intensity and risk of hemorrhagic and thromboembolic events (part 2 of 2)**

| International normalized ratio          | Hemorrhagic event  |                        | Thromboembolic event |                        | Combined events     |                        |
|-----------------------------------------|--------------------|------------------------|----------------------|------------------------|---------------------|------------------------|
|                                         | n / N              | Relative risk (95% CI) | n / N                | Relative risk (95% CI) | n / N               | Relative risk (95% CI) |
| <b>Kearon et al.<sup>12</sup></b>       | <b>3 / 738</b>     |                        | <b>8 / 738</b>       |                        | <b>11 / 738</b>     |                        |
| < 2                                     |                    | 0.7 (0.1–3.4)          |                      | 3.5 (1.1–19.2)         |                     | 0.5 (0.2–1.7)          |
| 3–5                                     |                    | 11.1 (3.7–77.7)        |                      | 2.8 (0.0–36.1)         |                     | 42.0 (15.2–156.0)      |
| > 5                                     |                    | NR                     |                      | NR                     |                     | NR                     |
| <b>Casais et al.<sup>13</sup></b>       | <b>2 / 811</b>     |                        | <b>NR</b>            |                        | <b>NR</b>           |                        |
| < 2                                     |                    | 1.0 (0.0–3.2)          |                      | NR                     |                     | NR                     |
| 3–5                                     |                    | 0.5 (0.1–1.5)          |                      | NR                     |                     | NR                     |
| > 5                                     |                    | 4.2 (1.6–12.1)         |                      | NR                     |                     | NR                     |
| <b>Palareti et al.<sup>14,15</sup></b>  | <b>6 / 2 745</b>   |                        | <b>27 / 2 745</b>    |                        | <b>33 / 2 745</b>   |                        |
| < 2                                     |                    | 2.0 (1.0–2.4)          |                      | 3.1 (1.8–5.4)          |                     | NR                     |
| 3–5                                     |                    | 1.4 (1.3–2.9)          |                      | 0.9 (0.3–1.7)          |                     | NR                     |
| > 5                                     |                    | 13.8 (6.1–16.6)        |                      | NR                     |                     | NR                     |
| <b>Van Walraven et al.<sup>16</sup></b> | <b>31 / 10 020</b> |                        | <b>46 / 10 020</b>   |                        | <b>77 / 10 020</b>  |                        |
| < 2                                     |                    | 0.9 (0.6–1.3)          |                      | 2.0 (1.4–3.1)          |                     | 1.3 (1.0–1.7)          |
| 3–5                                     |                    | 3.0 (1.4–3.9)          |                      | 2.1 (0.8–3.3)          |                     | 2.7 (2.0–3.5)          |
| > 5                                     |                    | 33.8 (12.9–54.4)       |                      | 9.0 (0.0–19.0)         |                     | 26.1 (16.0–37.8)       |
| <b>Azar et al.<sup>17</sup></b>         | <b>8 / 1 700</b>   |                        | <b>282 / 1 700</b>   |                        | <b>290 / 1 700</b>  |                        |
| < 2                                     |                    | 0.4 (0.1–1.7)          |                      | 2.5 (1.7–4.0)          |                     | 2.1 (1.5–3.3)          |
| 3–5                                     |                    | 2.1 (1.0–12.9)         |                      | 0.8 (0.6–1.4)          |                     | 1.1 (0.7–1.7)          |
| > 5                                     |                    | 11.1 (4.4–54.8)        |                      | 0.3 (0.0–0.9)          |                     | 2.0 (1.0–3.6)          |
| <b>Hylek et al.<sup>18</sup></b>        | <b>12 / 13 559</b> |                        | <b>97 / 13 559</b>   |                        | <b>109 / 13 559</b> |                        |
| < 2                                     |                    | 1.0 (0.4–1.8)          |                      | 5.1 (3.7–7.6)          |                     | 3.5 (2.6–4.8)          |
| 3–5                                     |                    | 2.3 (0.9–4.3)          |                      | 1.3 (0.5–2.4)          |                     | 1.7 (0.9–2.6)          |
| > 5                                     |                    | 26.0 (10.8–48.6)       |                      | 4.6 (0.0–10.5)         |                     | 13.1 (6.2–21.3)        |
| <b>Oden et al.<sup>19</sup></b>         | <b>28 / 42 451</b> |                        | <b>NR</b>            |                        | <b>NR</b>           |                        |
| < 2                                     |                    | 1.0 (0.6–1.5)          |                      | NR                     |                     | NR                     |
| 3–5                                     |                    | 2.5 (1.9–3.3)          |                      | NR                     |                     | NR                     |
| > 5                                     |                    | 11.7 (3.7–20.4)        |                      | NR                     |                     | NR                     |

Note: CI = confidence interval, EAFT = European Atrial Fibrillation Trial Study Group, ESPRIT = European and Australian Stroke Prevention in Reversible Ischaemia Trial.

**References**

1. Rosove MH, Brewer PM. Antiphospholipid thrombosis: clinical course after the first thrombotic event in 70 patients. *Ann Intern Med* 1992;117:303-8.
2. Hutten BA, Prins MH, Gent M, et al. Incidence of recurrent thromboembolic and bleeding complications among patients with venous thromboembolism in relation to both malignancy and achieved international normalized ratio: a retrospective analysis. *J Clin Oncol* 2000;18:3078-83.
3. Yasaka M, Minematsu K, Yamaguchi T. Optimal intensity of international normalized ratio in warfarin therapy for secondary prevention of stroke in patients with non-valvular atrial fibrillation. *Intern Med* 2001;40:1183-8.
4. Optimal oral anticoagulant therapy in patients with nonrheumatic atrial fibrillation and recent cerebral ischemia. The European Atrial Fibrillation Trial Study Group. *N Engl J Med* 1995;333:5-10.
5. Chimowitz MI, Lynn MJ, Howlett-Smith H, et al. Comparison of warfarin and aspirin for symptomatic intracranial arterial stenosis. *N Engl J Med* 2005;352:1305-16.
6. Andersen PV, Aagaard J. Low-dose warfarin in patients with Carbomedics heart valve prostheses. *Asian Cardiovasc Thorac Ann* 2000;8:11-4.
7. Torn M, Algra A, Rosendaal FR. Oral anticoagulation for cerebral ischemia of arterial origin: high initial bleeding risk. *Neurology* 2001;57:1993-9.

Appendix 5 to Oake N, Jennings A, Forster A, et al. Anticoagulation intensity and outcomes among patients prescribed oral anticoagulant therapy: a systematic review and meta-analysis. *CMAJ* 2008; 179(3):235-44.

8. Cheung CM, Tsoi TH, Huang CY. The lowest effective intensity of prophylactic anticoagulation for patients with atrial fibrillation. *Cerebrovasc Dis* 2005;20:114-9.
9. ESPRIT Study Group; Algra A. Medium intensity oral anticoagulants versus aspirin after cerebral ischaemia of arterial origin (ESPRIT): a randomised controlled trial. *Lancet Neurol* 2007;6:115-24.
10. Poli D, Antonucci E, Lombardi A, et al. Low rate of bleeding and thrombotic complications of oral anticoagulant therapy independent of age in the real-practice of an anticoagulation clinic. *Blood Coagul Fibrinolysis* 2003;14:269-75.
11. Tangelder MJD, Algra A, Lawson JA, et al. Optimal oral anticoagulant intensity to prevent secondary ischemic and hemorrhagic events in patients after infrainguinal bypass graft surgery. *J Vasc Surg* 2001;33:522-7.
12. Kearon C, Ginsberg JS, Kovacs MJ, et al. Comparison of low-intensity warfarin therapy with conventional-intensity warfarin therapy for long-term prevention of recurrent venous thromboembolism. *N Engl J Med* 2003;349:631-9.
13. Casais P, Luceros AS, Meschengieser S, et al. Bleeding risk factors in chronic oral anticoagulation with acenocoumarol. *Am J Hematol* 2000;63:192-6.
14. Palareti G, Manotti C, D'Angelo A, et al. Thrombotic events during oral anticoagulant treatment: results of the inception-cohort, prospective, collaborative ISCOAT study: ISCOAT study group (Italian Study on Complications of Oral Anticoagulant Therapy). *Thromb Haemost* 1997;78:1438-43.
15. Palareti G, Leali N, Coccheri S, et al. Bleeding complications of oral anticoagulant treatment: an inception-cohort, prospective collaborative study (ISCOAT). Italian Study on Complications of Oral Anticoagulant Therapy. *Lancet* 1996;348:423-8.
16. Van Walraven C, Oake N, Wells PS, et al. Burden of potentially avoidable anticoagulant-associated hemorrhagic and thromboembolic events in the elderly. *Chest* 2007;131:1508-15.
17. Azar AJ, Cannegieter SC, Deckers JW, et al. Optimal intensity of oral anticoagulant therapy after myocardial infarction. *J Am Coll Cardiol* 1996;27:1349-55.
18. Hylek EM, Go AS, Chang Y, et al. Effect of intensity of oral anticoagulation on stroke severity and mortality in atrial fibrillation. *N Engl J Med* 2003;349:1019-26.
19. Oden A, Fahlen M. Oral anticoagulation and risk of death: a medical record linkage study. *BMJ* 2002;325:1073-5.
