# Supplementary material
Source: PubMed Central journal article supplement (PMC2474869)
Supplement: supp_179_3_235_v2_6.pdf [file supp_179_3_235_v2_6.pdf]

**Appendix 6:** Association between anticoagulation intensity and risk of events in studies recording intracranial or fatal hemorrhages alone\*

| International normalized ratio | Hemorrhagic events<br>(n = 356 546) |                        | Combined events<br>(n = 214 095)† |                        |
|--------------------------------|-------------------------------------|------------------------|-----------------------------------|------------------------|
|                                | Relative risk (95% CI)              | Absolute risk (95% CI) | Relative risk (95% CI)            | Absolute risk (95% CI) |
| < 2                            | 1.4 (0.8–2.5)                       | 0.5 (0.3–0.9)          | 3.1 (2.6–3.6)                     | 4.1 (2.7–6.2)          |
| 2–3                            | 1.0 (Ref)                           | 0.3 (0.3–0.4)          | 1.0 (Ref)                         | 1.3 (0.7–2.3)          |
| 3–5                            | 3.1 (2.0–4.6)                       | 1.0 (0.7–1.7)          | 2.0 (1.6–2.4)                     | 2.6 (1.2–5.5)          |
| > 5                            | 28.8 (12.6–66.0)                    | 9.9 (4.0–24.7)         | 16.7 (12.3–22.6)                  | 22.0 (9.0–52.8)        |

Note: CI = confidence interval.

\*Studies by the ESPRIT group,<sup>1</sup> Hylek<sup>2</sup> and Oden.<sup>3</sup>

†Oden did not report thromboembolic events and we excluded this study from our analysis of combined events.

**References**

1. ESPRIT Study Group; Algra A. Medium intensity oral anticoagulants versus aspirin after cerebral ischaemia of arterial origin (ESPRIT): a randomised controlled trial. *Lancet Neurol* 2007;6:115-24.
2. Hylek EM, Go AS, Chang Y, et al. Effect of intensity of oral anticoagulation on stroke severity and mortality in atrial fibrillation. *N Engl J Med* 2003;349:1019-26.
3. Oden A, Fahlen M. Oral anticoagulation and risk of death: a medical record linkage study. *BMJ* 2002;325:1073-5.
