# Supplementary material
Source: PubMed Central journal article supplement (PMC2474869)
Supplement: supp_179_3_235_v2_7.pdf [file supp_179_3_235_v2_7.pdf]

**Appendix 7:** Association of anticoagulation intensity with risk of events in studies that included patients with atherosclerotic diseases only (a), with atrial fibrillation only (b) and with venous thromboembolism only (c)

**Appendix 7a:** Association of anticoagulation intensity with risk of events in studies that included only patients with atherosclerotic diseases

| International normalized ratio | Hemorrhagic event<br>(n = 54 207) |                           | Thromboembolic event<br>(n = 54 207) |                           | Combined events<br>(n = 54 207) |                           |
|--------------------------------|-----------------------------------|---------------------------|--------------------------------------|---------------------------|---------------------------------|---------------------------|
|                                | Relative risk<br>(95% CI)         | Absolute risk<br>(95% CI) | Relative risk<br>(95% CI)            | Absolute risk<br>(95% CI) | Relative risk<br>(95% CI)       | Absolute risk<br>(95% CI) |
| < 2                            | 1.4 (0.6–3.4)                     | 1.8 (0.6–5.7)             | 3.4 (2.5–4.6)                        | 11.3 (6.8–18.7)           | 2.8 (2.3–3.4)                   | 11.8 (7.4–18.7)           |
| 2–3                            | 1.0 (Ref)                         | 1.3 (0.7–2.5)             | 1.0 (Ref)                            | 3.3 (2.3–4.7)             | 1.0 (Ref)                       | 4.2 (2.8–6.3)             |
| 3–5                            | 2.7 (1.7–4.2)                     | 3.5 (1.8–6.6)             | 0.6 (0.4–1.1)                        | 2.1 (1.4–3.0)             | 1.2 (0.7–2.0)                   | 5.1 (3.5–7.4)             |
| > 5                            | 19.8 (9.4–41.5)                   | 26.0 (12.2–55.1)          | 2.2 (0.9–5.1)                        | 7.2 (2.5–20.9)            | 7.2 (3.5–14.9)                  | 30.2 (15.7–58.0)          |

**Appendix 7b:** Association of anticoagulation intensity with risk of events in studies that included only patients with atrial fibrillation

| International normalized ratio | Hemorrhagic event<br>(n = 414 531) |                           | Thromboembolic event<br>(n = 414 531) |                           | Combined events<br>(n = 414 531) |                           |
|--------------------------------|------------------------------------|---------------------------|---------------------------------------|---------------------------|----------------------------------|---------------------------|
|                                | Relative risk<br>(95% CI)          | Absolute risk<br>(95% CI) | Relative risk<br>(95% CI)             | Absolute risk<br>(95% CI) | Relative risk<br>(95% CI)        | Absolute risk<br>(95% CI) |
| < 2                            | 0.3 (0.1–0.9)                      | 0.4 (0.3–0.5)             | 4.8 (3.2–7.1)                         | 6.1 (3.1–12.0)            | 2.3 (1.1–5.0)                    | 4.9 (2.8–8.4)             |
| 2–3                            | 1.0 (Ref)                          | 1.3 (0.5–3.4)             | 1.0 (Ref)                             | 1.3 (0.6–2.7)             | 1.0 (Ref)                        | 2.1 (0.9–4.8)             |
| 3–5                            | 4.8 (2.4–9.7)                      | 6.1 (1.7–22.5)            | 1.6 (0.8–3.4)                         | 2.0 (0.6–6.3)             | 2.2 (1.3–3.8)                    | 4.7 (1.9–11.4)            |
| > 5                            | 20.3 (10.7–38.3)                   | 25.7 (9.7–67.9)           | 3.9 (3.0–5.1)                         | 4.5 (2.6–7.9)             | 15.3 (9.5–24.7)                  | 32.3 (13.2–79.1)          |

**Appendix 7c:** Association of anticoagulation intensity with risk of events in studies that included only patients with venous thromboembolism

| International normalized ratio | Hemorrhagic event<br>(n = 22 041) |                           | Thromboembolic event<br>(n = 32 096) |                           | Combined events<br>(n = 22 041) |                           |
|--------------------------------|-----------------------------------|---------------------------|--------------------------------------|---------------------------|---------------------------------|---------------------------|
|                                | Relative rate<br>(95% CI)         | Absolute rate<br>(95% CI) | Relative rate<br>(95% CI)            | Absolute rate<br>(95% CI) | Relative rate<br>(95% CI)       | Absolute rate<br>(95% CI) |
| < 2                            | 1.3 (0.6–2.7)                     | 1.1 (0.2–6.0)             | 4.1 (2.0–8.5)                        | 14.6 (4.1–52.3)           | 2.4 (2.1–2.7)                   | 10.5 (2.0–54.6)           |
| 2–3                            | 1.0 (Ref)                         | 1.0 (0.4–2.2)             | 1.0 (Ref)                            | 3.6 (1.0–13.0)            | 1.0 (Ref)                       | 4.4 (1.0–20.2)            |
| 3–5                            | 5.4 (1.5–19.4)                    | 4.9 (3.4–6.9)             | 0.6 (0.2–1.9)                        | 2.2 (0.4–11.7)            | 1.6 (0.6–4.1)                   | 7.0 (3.9–12.4)            |
| > 5*                           |                                   |                           |                                      |                           |                                 |                           |

Note: CI = confidence interval.

\*Studies did not report events and patient observation time that could be grouped into the international normalized ratio category > 5.
